# Supplementary material for: CNOT1 contributes to small nuclear non-coding RNA maturation
Source: Research Square preprint supplement (doi:10.21203/rs.3.rs-6043401/v1), 2025-04-02
Supplement: Supplementary file 1 [file b3d9e3dd468e4f7f679e9bda.docx]

**CNOT1 contributes to small nuclear non-coding RNA maturation**

Chisato Umehara1,3, Reika Sakurai1,3, Hiroaki Sako2,3*, Tadashi Yamamoto2*

1 Keio University School of Medicine, 35 Shinanomachi, Shinjuku, Tokyo 160-8582, Japan

2 Cell Signal Unit, Okinawa Institute of Science and Technology Graduate University (OIST), Onna, Okinawa 904-0495, Japan.

* co-corresponding

3 These authors contributed equally


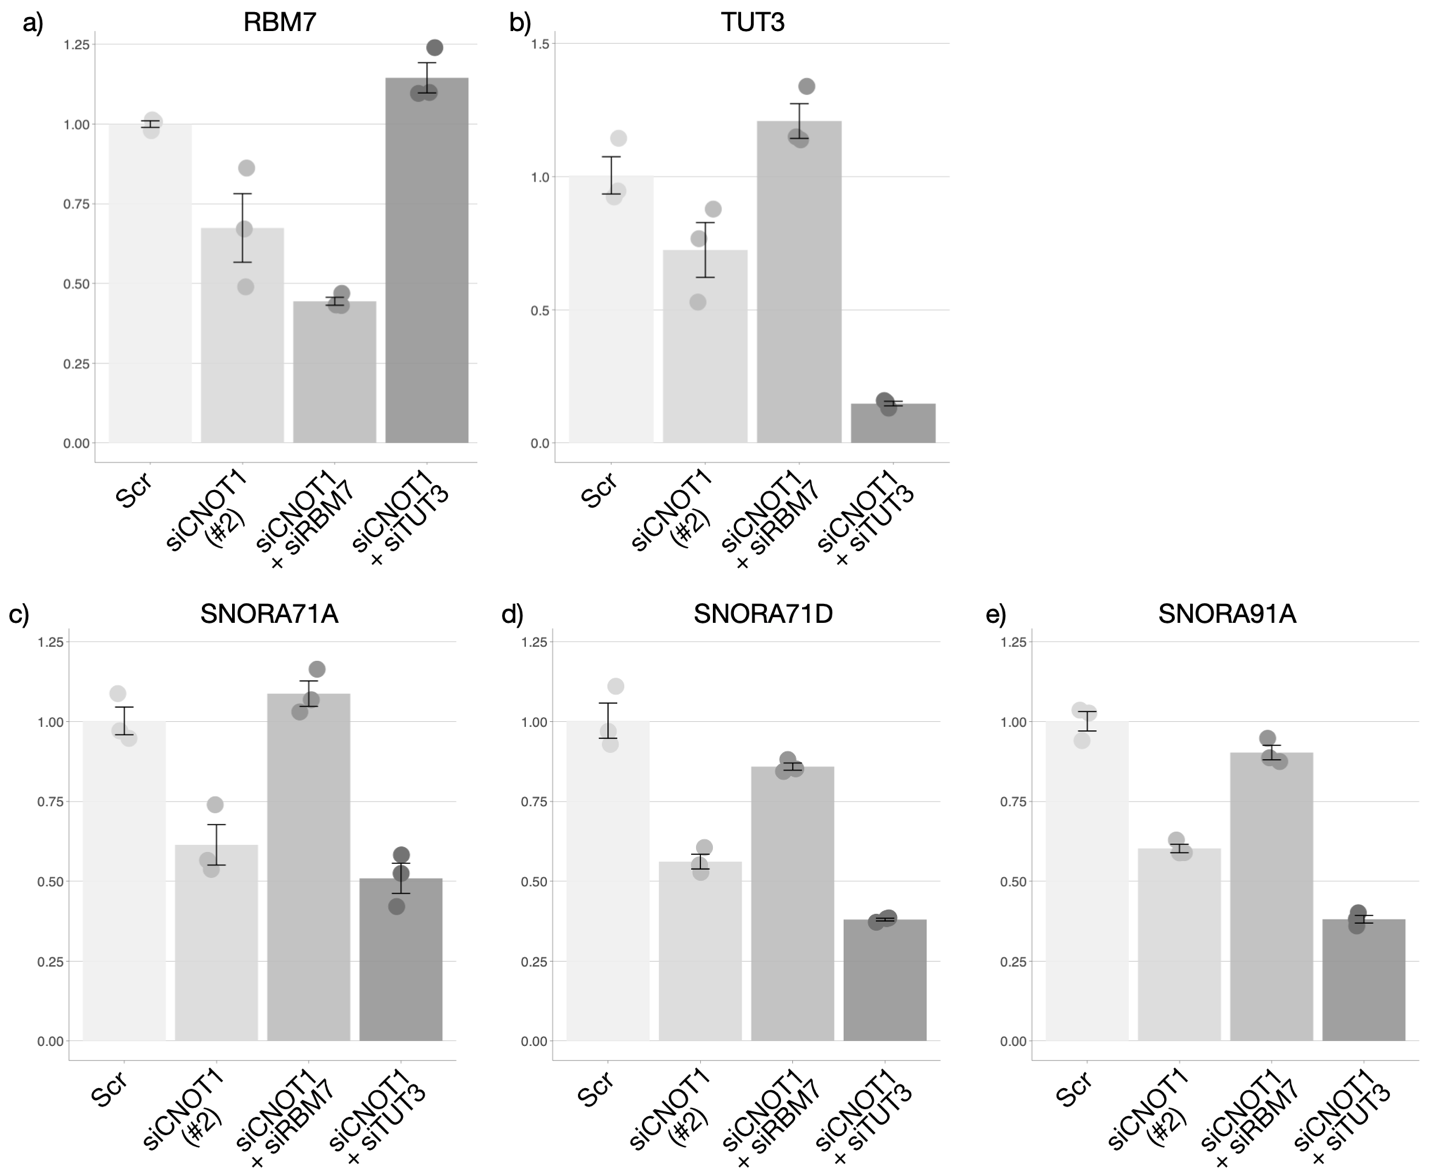


Supplementary Figure 1. Knockdown of RBM7, but not TUT3 rescued the effect of CNOT1 depletion on sno/scaRNAs.

HEK293T cells were treated with Scr control, siCNOT1, or siCNOT1 together with siRBM7 or TUT3 for 96 hr, followed by RT-qPCR analysis (a-e). N=3. Mean ± SE.


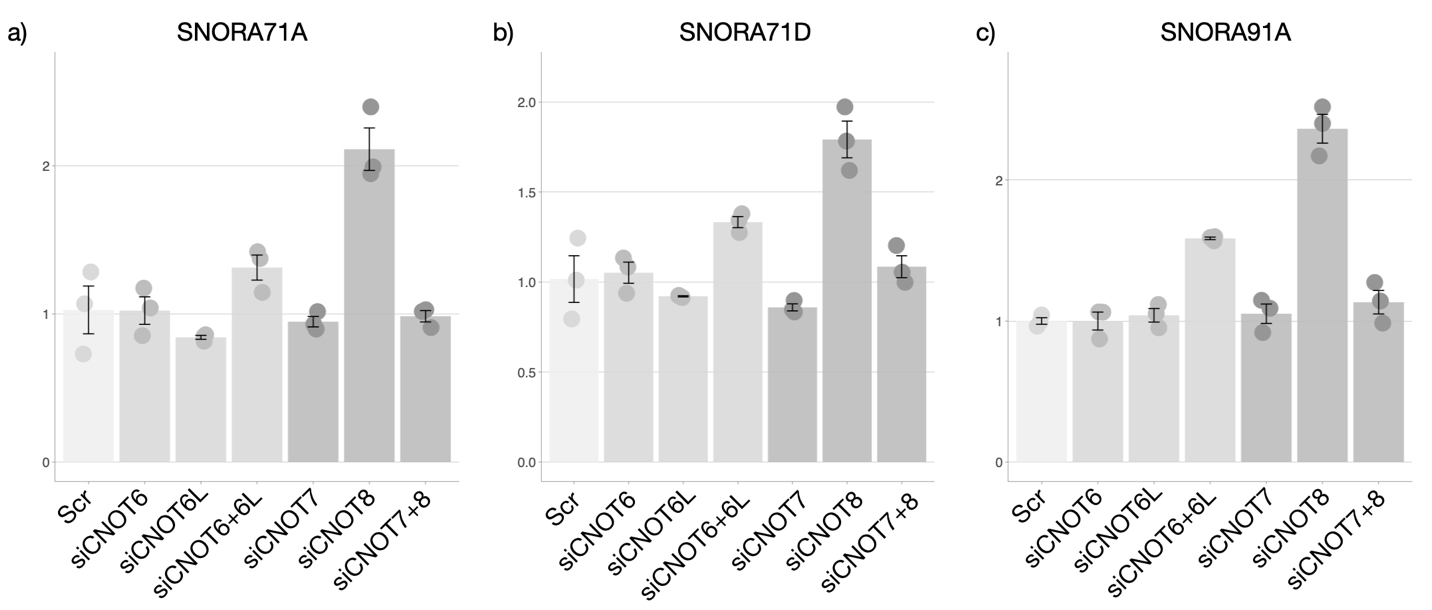


Supplementary Figure 2. Knockdown of deadenylase subunits of CCR4-NOT did not reduce the expression of snoRNAs.

HEK293T cells were treated with Scr control, combination of siCNOT6, siCNOT6L, siCNOT7, and siCNOT8 followed by RT-qPCR analysis (a-c). N=3. Mean ± SE.


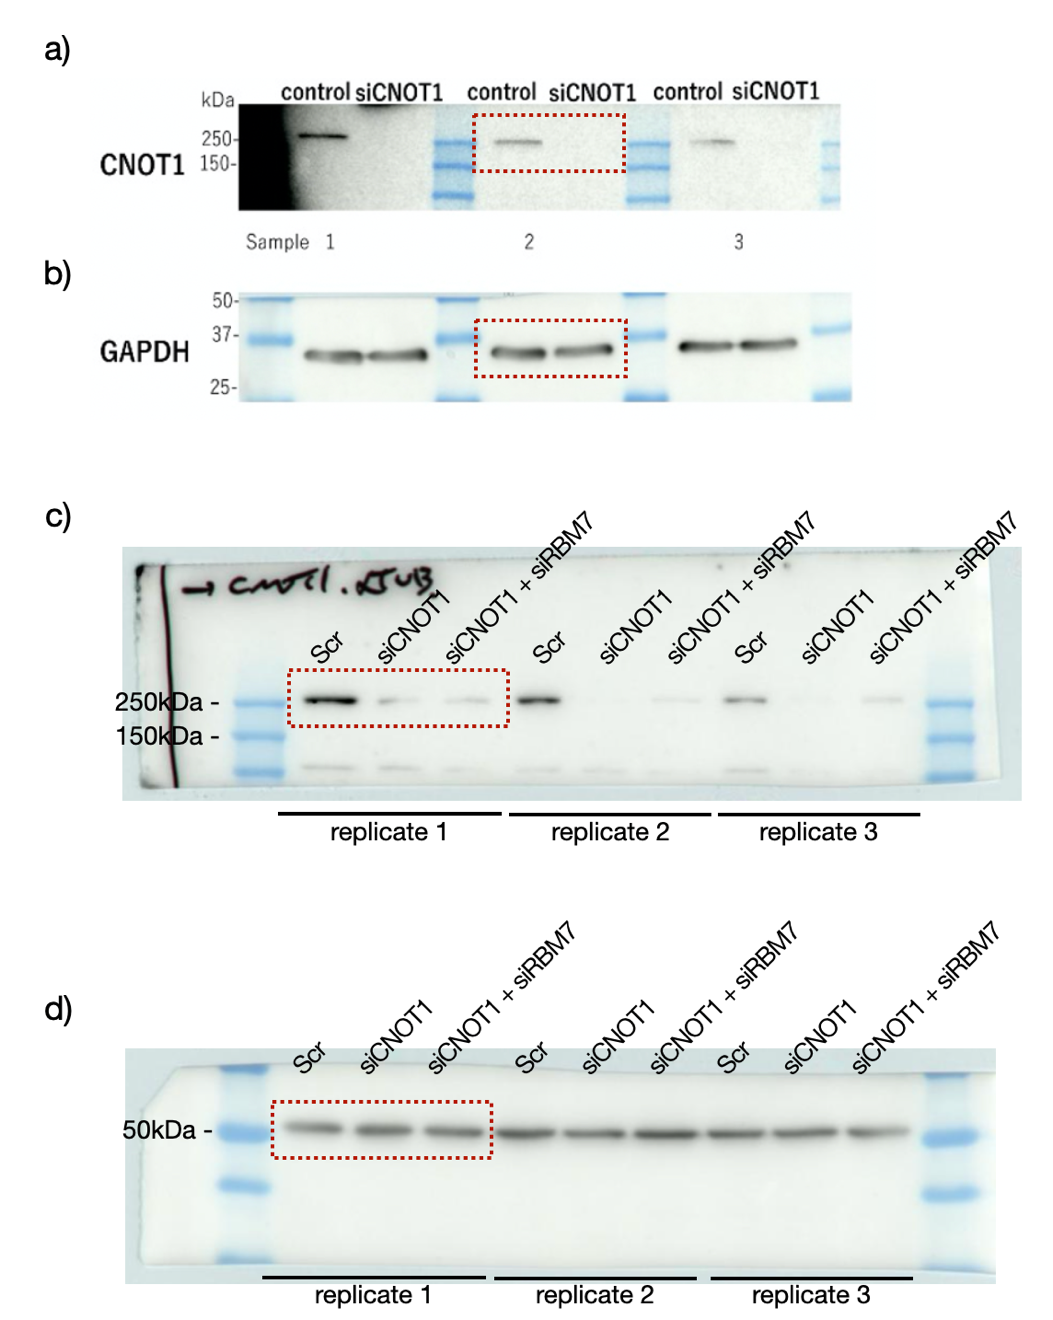


Supplementary Figure 3. Uncropped western blot images with replicates.

Red dashed lines were cropped to yield the representative images shown in Figure 3a (a, b) as well as Figure 6a (c, d).

| Supplementary Table 1. Primer suqences | |
| --- | --- |
| EBLN3P_Fw | gtgCATACAGACACACAtatttctg |
| EBLN3P_Rv | ccaatctagaaaatctgaacaccgg |
| LINC01003_Fw | GTCAACAAATACTTCTTGGACGT |
| LINC01003_Rv | CATAGTAATATTTTATTTTCTTCCCAATGTGG |
| SCARNA5_Fw | GGCTCACAGCTGACGAGTATC |
| SCARNA5_Rv | TGCACCATCACACCCATGAC |
| SCARNA6_Fw | CACTCCGTGATGTCCCTCAT |
| SCARNA6_Rv | ACAGATACCAGCACTCCCAAC |
| SCARNA7_Fw | GTGTGTGCTTGTGGTGGCTA |
| SCARNA7_Rv | CAGGCTAGTTAGGTGAGCTGT |
| SCARNA13_Fw | GAGCACACCAGACTTGCAGA |
| SCARNA13_Rv | CGTGGCAACAGTGACCAGAA |
| SCARNA27_Fw | CATGGTTTGGGGCTGCTATCT |
| SCARNA27_Rv | GTAGGAGGCTTTTTCAGAGGAGAA |
| SNORA12_Fw | ATGGCAAAGGCTTGTGACGG |
| SNORA12_Rv | GGAGCCATTCTCTGATGCAGG |
| SNORA71A_Fw | CTGAAAGAGGTTGTCCCCGT |
| SNORA71A_Rv | GTTGTGTGAAAGCTTCAGGGT |
| SNORA71D_Fw | TCGAAAGTGATCGTGGGCT |
| SNORA71D_Rv | GAAGCACTTTCCGCGATTTCT |
| SNORA73B_Fw | CCAACGTGGATACCCTGGGA |
| SNORA73B_Rv | CACAGGACTCTGGGAAGCTGTA |
| SNORD69_Fw | GTGAAGCAAATGATGATAAACTGGA |
| SNORD69_Rv | AACATGAAGCTCAGGGTTGGA |
| SNORD91A_Fw | GGTTTTATTCATATCGTCTGAACCT |
| SNORD91A_Rv | AGTCTCAGAACCACACAGAGA |
| SNORD104_Fw | CCTGCTGTGATGACATTCCAATTA |
| SNORD104_Rv | CTCAGACTCCAGTTCGCATCA |
| TSR1_Fw | AAGCTCATAAAGGCGGACGG |
| TSR1_Rv | CTTCTCTGCCAGAACCGCC |
| SNHG17_Fw | CTGGGATCTGGGTTTGCTGA |
| SNHG17_Rv | ATTGAACAGTGGATCCGGGG |
| RBM7_Fw | ACCAGGCTGGGCCAGTAATA |
| RBM7_Rv | TGGGGCATGACTACTTCCTGA |

| Supplementary Table 2. siRNA suqences | |
| --- | --- |
| Scr | UUCUCCGAACGUGUCACGUTT |
| siCNOT1 #1 | CUUCACGUCGUGAAUACCUCA |
| siCNOT1 #2 | UGCUCCUGACCUCUGAUAAAG |
| siCNOT6 | GGUUGAAACGGAACAGUAUUA |
| siCNOT6L | GACCCAGAGUAUUCUGAUGTT |
| siCNOT7 | GGUGUAAUGUAGACUUGUUAA |
| siCNOT8 | GACCCUUCUCGAGGACAUUUG |
| siTUT3 | GGACGACACUUCAAUUAUUGU |
| siRBM7 | #4427037 (ID# s19835, Silence Select Pre-Designed siRNA, Invitrogen) |
